# Supplementary material for: Highly resilient, biocompatible, and antibacterial carbon nanotube/hydroxybutyl chitosan sponge dressing for rapid and effective hemostasis
Source: Royal Society of Chemistry journal article supplement (doi:10.1039/d1tb01911b), 2021-01-01
Supplement: d1tb01911b1.pdf [file d1tb01911b1.pdf]

## Electronic Supplementary Information

### Highly Resilient, Biocompatible, and Antibacterial Carbon Nanotube/Hydroxybutyl Chitosan Sponge Dressing for Rapid and Effective Hemostasis

Wei Zhang <sup>ab</sup>, Liming Zhao <sup>ac</sup>, Chen Gao <sup>b</sup>, Jie Huang <sup>\*b</sup>, Qingwen Li <sup>\*c</sup> and Zhijun Zhang <sup>\*b</sup>

*<sup>a</sup> School of Nano-Tech and Nano-Bionics, University of Science and Technology of China, Hefei 230026, China*

*<sup>b</sup> CAS Key Laboratory of Nano-Bio Interface, Division of Nanobiomedicine, Suzhou Institute of Nano-Tech and Nano-bionics, Chinese Academy of Sciences, Suzhou 215123, China*

*<sup>c</sup> CAS Key Laboratory of Multifunctional Nanomaterials and Smart Systems, Advanced Materials Division, Suzhou Institute of Nano-Tech and Nano-Bionics, Chinese Academy of Sciences, Suzhou, 215123, China*

\*Corresponding authors:

Jie Huang, E-mail: [jhuang2008@sinano.ac.cn](mailto:jhuang2008@sinano.ac.cn)

Qingwen Li, E-mail: [qwli2007@sinano.ac.cn](mailto:qwli2007@sinano.ac.cn)

Zhijun Zhang, E-mail: zjzhang2007@sinano.ac.cn

Table S1 The water/blood absorption speed of sponges

| Sample         | Water absorption speed (s) | Blood absorption speed (s) |
|----------------|----------------------------|----------------------------|
| Gelatin sponge | > 120                      | > 120                      |
| JWCNT          | > 120                      | > 120                      |
| JWCNT/0.1%HBC  | 47.33 ± 2.52 <sup>a</sup>  | 61.33 ± 4.04 <sup>a</sup>  |
| JWCNT/0.5%HBC  | 12.33 ± 1.53 <sup>a</sup>  | 26.67 ± 5.13 <sup>a</sup>  |
| JWCNT/1%HBC    | 21.67 ± 1.53 <sup>a</sup>  | 42.00 ± 2.65 <sup>a</sup>  |

<sup>a</sup> indicates  $p < 0.01$  vs gelatin sponge.
